# Supplementary material
Source: PubMed Central journal article supplement (PMC11114813)
Supplement: 18_2011_819_MOESM1_ESM.pdf [file 18_2011_819_MOESM1_ESM.pdf]

## **Regulation of Toll-like receptor signaling by NDP52-mediated selective autophagy is normally inactivated by A20**

Megumi Inomata,<sup>1</sup> Shumpei Niida,<sup>2</sup> Ken-ichiro Shibata,<sup>3</sup> and Takeshi Into<sup>1\*</sup>

<sup>1</sup> Department of Oral Microbiology, Division of Oral Infections and Health Sciences, Asahi University School of Dentistry, Hozumi 1851, Mizuho, Gifu 501-0296, Japan; <sup>2</sup> Laboratory of Genomics and Proteomics, National Institute for Longevity Sciences, National Center for Geriatrics and Gerontology, Obu, Aichi 474-8522, Japan; <sup>3</sup> Laboratory of Oral Molecular Microbiology, Department of Oral Pathobiological Science, Hokkaido University Graduate School of Dental Medicine, Sapporo 060-8586, Japan.

\*Corresponding author. Mailing address: Department of Oral Microbiology, Division of Oral Infections and Health Sciences, Asahi University School of Dentistry, Hozumi 1851, Mizuho, Gifu 501-0296, Japan. Phone & Fax: 81 58 3291422. E-mail: into@dent.asahi-u.ac.jp

**-Journal name: Cell. Mol. Life Sci.**

# Supplementary Fig. S1

Human bone marrow mononuclear cells

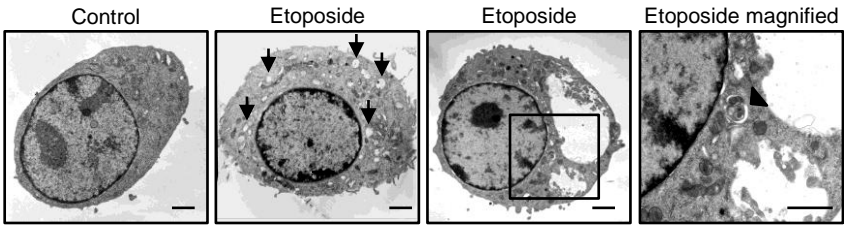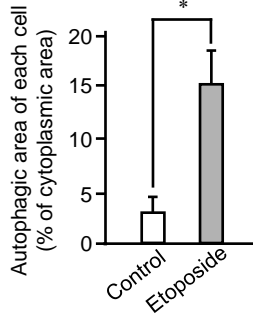

# Supplementary Fig. S2

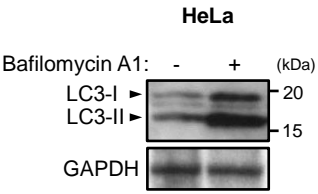

# Supplementary Fig. S3

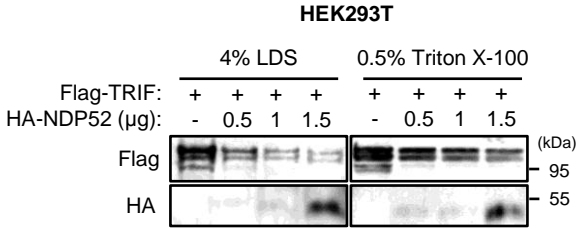

# Supplementary Fig. S4

|                  | <b>SKICH</b>                                                                                          |     |
|------------------|-------------------------------------------------------------------------------------------------------|-----|
| Homo sapiens     | MEETIKDPPTSAVLLDHCHEFSQVIFNSVEKFIYPGGDVTCHYFTQHFIPRRKDWIGIFRVGWKTTREYYTFMWTLPV-DLNNSAKQQEVQFKAYLLPK   | 100 |
| Pan troglodytes  | MEETIKDPPTSAVLLDHCHEFSQVIFNSVEKFIYPGGDVTCHYFTQHFIPRRKDWIGIFRVGWKTTREYYTFMWTLPV-DLNNSAKQQEVQFKAYLLPK   | 100 |
| Bos taurus       | MEETVDDPPTSAVLLDHCHEFSQVIFNSVEKFIYPGGDITCYTTLTQHFIPRRKDWIGIFRVGWKTTREYYTFMWTLPV-DLNSSEAKQQEVQFKAYLLPK | 100 |
| Canis familiaris | MDETVDDPPTSAVLLDHCHEFSQVIFNSVEKFIYPGGDVTCTYTLTQHFIPRRKDWIGIFRVGWKTTREYYTFMWTLPV-DLNSSEAKQQEVQFKAYLLPK | 100 |
| Mus musculus     | MDQCP1--PT---LLEHGNSQVLFNNVEKFIAPRGDIMCYTTLTEKFIIPRRKDWIGIFRVGWKTTREYYTFMWTLPV-DQNKDSATQQEIQFKAYLLPK  | 95  |
| Gallus gallus    | MDETSDEPPTSAVILDSHFSHVIFNDVEKFIYPGGDVTCTYTLTQHFIPRRKDWIGIFRVGWKTTREYYTFMWTLPV-DVHGDSAVQQEIQFKAYLLPK   | 100 |
| Danio rerio      | MSDRTEEE--SIVIMETSSFSQVFNVDNPPSPFNTAVTCRFT-TGDLQPNPRDWIGIYKVGWNSAQQYNYVWVEAPHLQD---AKPEQVIFKESYLLPK   | 94  |
| <hr/>            |                                                                                                       |     |
| Homo sapiens     | DD-EYYQFCYVDEDDGVVRGASIPQFRPEN-----EEDILVVTQGEVEEIEQHNLCKENQELKDSGISLQKQNSDMQAEQLKKQE---ELETQSI       | 190 |
| Pan troglodytes  | DD-EYYQFCYVDEDDGVVRGASIPQFRPEN-----EEDILVVTQGEVEEIEQHNLCKENQELKDSGISLQKQNSDMQAEQLKKQE---ELETQSI       | 190 |
| Bos taurus       | DD-EYYQFCYVDDGVVRGASIPQFRPEN-----EEDILVVTQGEVEEIEQHNLCKENRELKDSVSLQKQNSDMQATLKKQE---ELETLSKI          | 190 |
| Canis familiaris | DD-EYYQFCYVDDGVVRGASIPQFRPEN-----EEDILVVTQGEVEEIEQHNLCKENQELKDSVSLQKQNSDMQAEHLKKE---DLETLKST          | 190 |
| Mus musculus     | DV-ERYQFCYVDEDDGLRGTSIPFQFCDDPD-----EDIMVVINKEK-VEEMEQLSEELYQQNELKD-----K-YADLHEQLQRKQVA---LEATQRS    | 178 |
| Gallus gallus    | DD-EYYQFCYIDDDGTIRGASVPPQFRAET-----EDDILVVTQGEVEEIEQLNKNLKENKLLQANGESLQKQNTDLQEDLKKTQELQNVLESLSRS     | 193 |
| Danio rerio      | DDGEFYQFCYVDSGHVKGASTPEFCQNETSLDSCLEKDLLVITTEQEQTEIMEKEKEDFLKEIESLKEKNTILRNELDERLHEMSRLRST---LEDLKS   | 192 |
| <hr/>            |                                                                                                       |     |
|                  | <b>Coiled-coil</b>                                                                                    |     |
| Homo sapiens     | NKKLELKV-----KEQKDYWETELLQLKEQNQKMSSENEKMGIR-----VDQLQAQLSTQEKEMEKLVQGDQDKTEQLEQLKENDHFLSLTE          | 271 |
| Pan troglodytes  | NKKLELKV-----KEQKDYWETELLQLKEQNQKMSSENEKMGIR-----VDQLQAQLSTQEKEMEKLVQADQDKTEQLEQLKENDHFLSLTE          | 271 |
| Bos taurus       | NKKLEQTM-----KEQKDCWEIELLQLKEQNQKMSSENEKMGVR-----VDQLQAQLSNQGREMEKLVQGVQDKTEQLEHLKKEENGFLSLTE         | 271 |
| Canis familiaris | NKKLEQQV-----KAQKDCWETELLQLKEQNQKMATENKLGVR-----VEQLQAQLSTQEKIEKLVQGSQDKTEQLEHLKKEKESQLLLTLQ          | 271 |
| Mus musculus     | NKTLBHKVE-----E-KASWEKEKASWEBEKASWEBEKASWEEEKASWEEEKASWEEEKASWEEEKASWEEEKASWEEEKASWEEEKASWEEEKAS      | 268 |
| Gallus gallus    | TEKLELESSLKENKHLKELNECREAELHQFKEQIQNVTSBEKRLTKLKTALDHVDQLSGLLSYEKEIEDLVHSNRDKTKCESLKEENQLCMTITQ       | 294 |
| Danio rerio      | DKPETPLPD-----EQS-YNAIEESLTPLEKYEKAV-QKIFVLKQER-----TELQQEIELQDTEILRLSTLLKEMEKNYSKVQDQAKLLQLLDVQS     | 277 |
| <hr/>            |                                                                                                       |     |
|                  | <b>Leucine zipper</b>                                                                                 |     |
| Homo sapiens     | QRKDQKLEQTVQEMKQNETTAMKQQLMDENFDLSKRLSENEIICNALQREKERLEGENDLLKRENSRLLSYMGLDFNSLPYQVPTSDEGGARQNPQ--    | 373 |
| Pan troglodytes  | QRKDQKLEQTVQEMKQNETTAMKQQLMDENFDLSKRLSENKIICNALQREKERLEGENDLLKRENSRLLSYMGLDFNSLPYQVPTSDEGGARQNPQ--    | 373 |
| Bos taurus       | QREHQKLEQTVQEMKQKETTAAKQQLTDQNMDSLKRLSENMI IHDVLOREKERKEMKENDYLKRENNRLLSYMGLDCLDCLSYQVPTSNOGGTRQDQ--  | 373 |
| Canis familiaris | QREHQKLEQTVQEMKQKETTAMKQQLTDENSLSKRLSENKIMGSTLQREKERLEKENDLLKRENSRLLSYMGLDFNSLPYQVPTSNOAGAGQNPQ--     | 373 |
| Mus musculus     | WEEKASWEEEKASWEEEKASWEEEKASWEEEKASWEEEKASWEEEKASWEEEKASWEEEKASWEEEKASWEEEKASWEEEKASWEEEKASWEEEKAS     | 331 |
| Gallus gallus    | EKEQKLEKNCLEHLKGAENLTLRLQNEQRQNSDLMEKELEEQKRLFPQTQAKQKESDEENQKLRKEKDSFLRLR----SHPRDVS SVSQAQAFVPAPE   | 390 |
| Danio rerio      | SRKDNKELQMEIQELRDKCAENKALQTSM-----LEQRAQENDK                                                          | 317 |
| <hr/>            |                                                                                                       |     |
|                  | <b>LIM-like</b>                                                                                       |     |
| Homo sapiens     | -LAYGNPYS--GI-QESSSPSPLSIKCPICK---AD---DICDHTE-QQQMOPLCNPCICDKIFPATEKQIFEDHVFCHSL                     | 446 |
| Pan troglodytes  | -LAYGNPYS--GI-QESSSPSPLSIKCPICK---AD---DICDHTE-QQQMOPLCNPCICDKIFPATEKQIFEDHVFCHSL                     | 446 |
| Bos taurus       | -LVFGNPYS--GI-QESSAPSLLSIKCPICK---SDFAADVFDHNLALQHLQTLNLCNCPICDKTFFAKEKQIFEDHVFCHTL                   | 450 |
| Canis familiaris | -LVYGNPYS--GI-QESSAPSLRTRMCRPTCK---SDLADDFGFTLE-QQHMEALCLNCPICDKTFFAKEKQIFEDHVFCHTL                   | 449 |
| Gallus gallus    | DFVFGNPYHAAGANQEARATGDISIRKCPICNDIFPD---DIETRDYE--AHVQSHLLECPVCNEAFKSNQVFDHMLCHSL                     | 469 |

# Supplementary Fig. S5

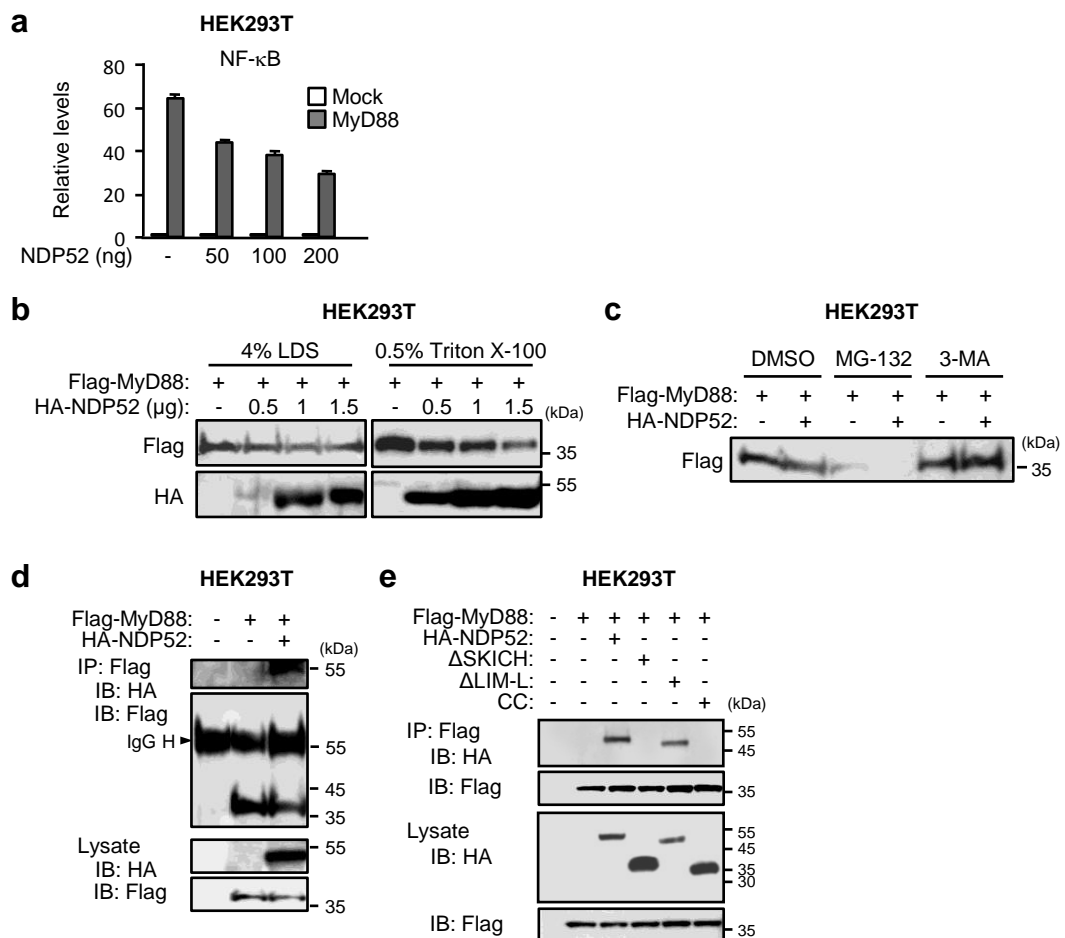

# Supplementary Fig. S6

NDP52 : 395 KK**C**P**I**C**K**AD**D**I**C**DHTLEQQQM**Q**PL**C**F**N**C**P**I**C**DKIFPATEKQIFEDHVF**C**H**S**L 446  
COCOA : 654 KE**C**P**I**C**K**ERFPAESDKDALEDHMDGHFFFSTQDPFT**F**E 691  
TAX1BP1: 686 KK**C**PL**C**ELMF**[PPNY]**DQSKFEEHVESHW**K**V**C**PM**C**SE**Q**F**[PPDY]**DQQVFERHVQTHFDQNVLNFD 747

NDP52 : 395 KK**C**P**I**C-KAD**D**I**C**DHTLEQQQ-M**Q**PL**C**F**N**C**P**I**C**DKIFPATEKQIFEDHVF**C**H**S**L 446  
CRP : 7 KK**C**GV**C**QKT**V**YFAEEV**Q**CEGNSFH**K**S**C**FL**C**M**V**C**K**KNLDSTTVAVHGEEI**Y**C**K**S-C**Y**G**K** 63  
CRIP1 : 2 PK**C**PK**C**NKEVYFAERV**T**SLGKD**W**HR**P**CL**K**CE**K**CGK**T**LTSGGHAEGEK**P**YCN**H**PC**Y**AA 59  
CRIP2 : 3 SK**C**PK**C**DK**T**YFAEKVSSLGKD**W**HK**F**CL**K**CE**R**CS**K**TLTPGGHA**E**HDG**K**PF**C**HK**P**C**Y**AT 60
